# Supplementary material for: Myogenesis modelled by human pluripotent stem cells: a multi‐omic study of Duchenne myopathy early onset
Source: PubMed Central journal article supplement (PMC7890274; doi:10.1002/jcsm.12665), 2021-02-14
Supplement: JCSM-12-209-s019.pdf [file JCSM-12-209-s019.pdf]

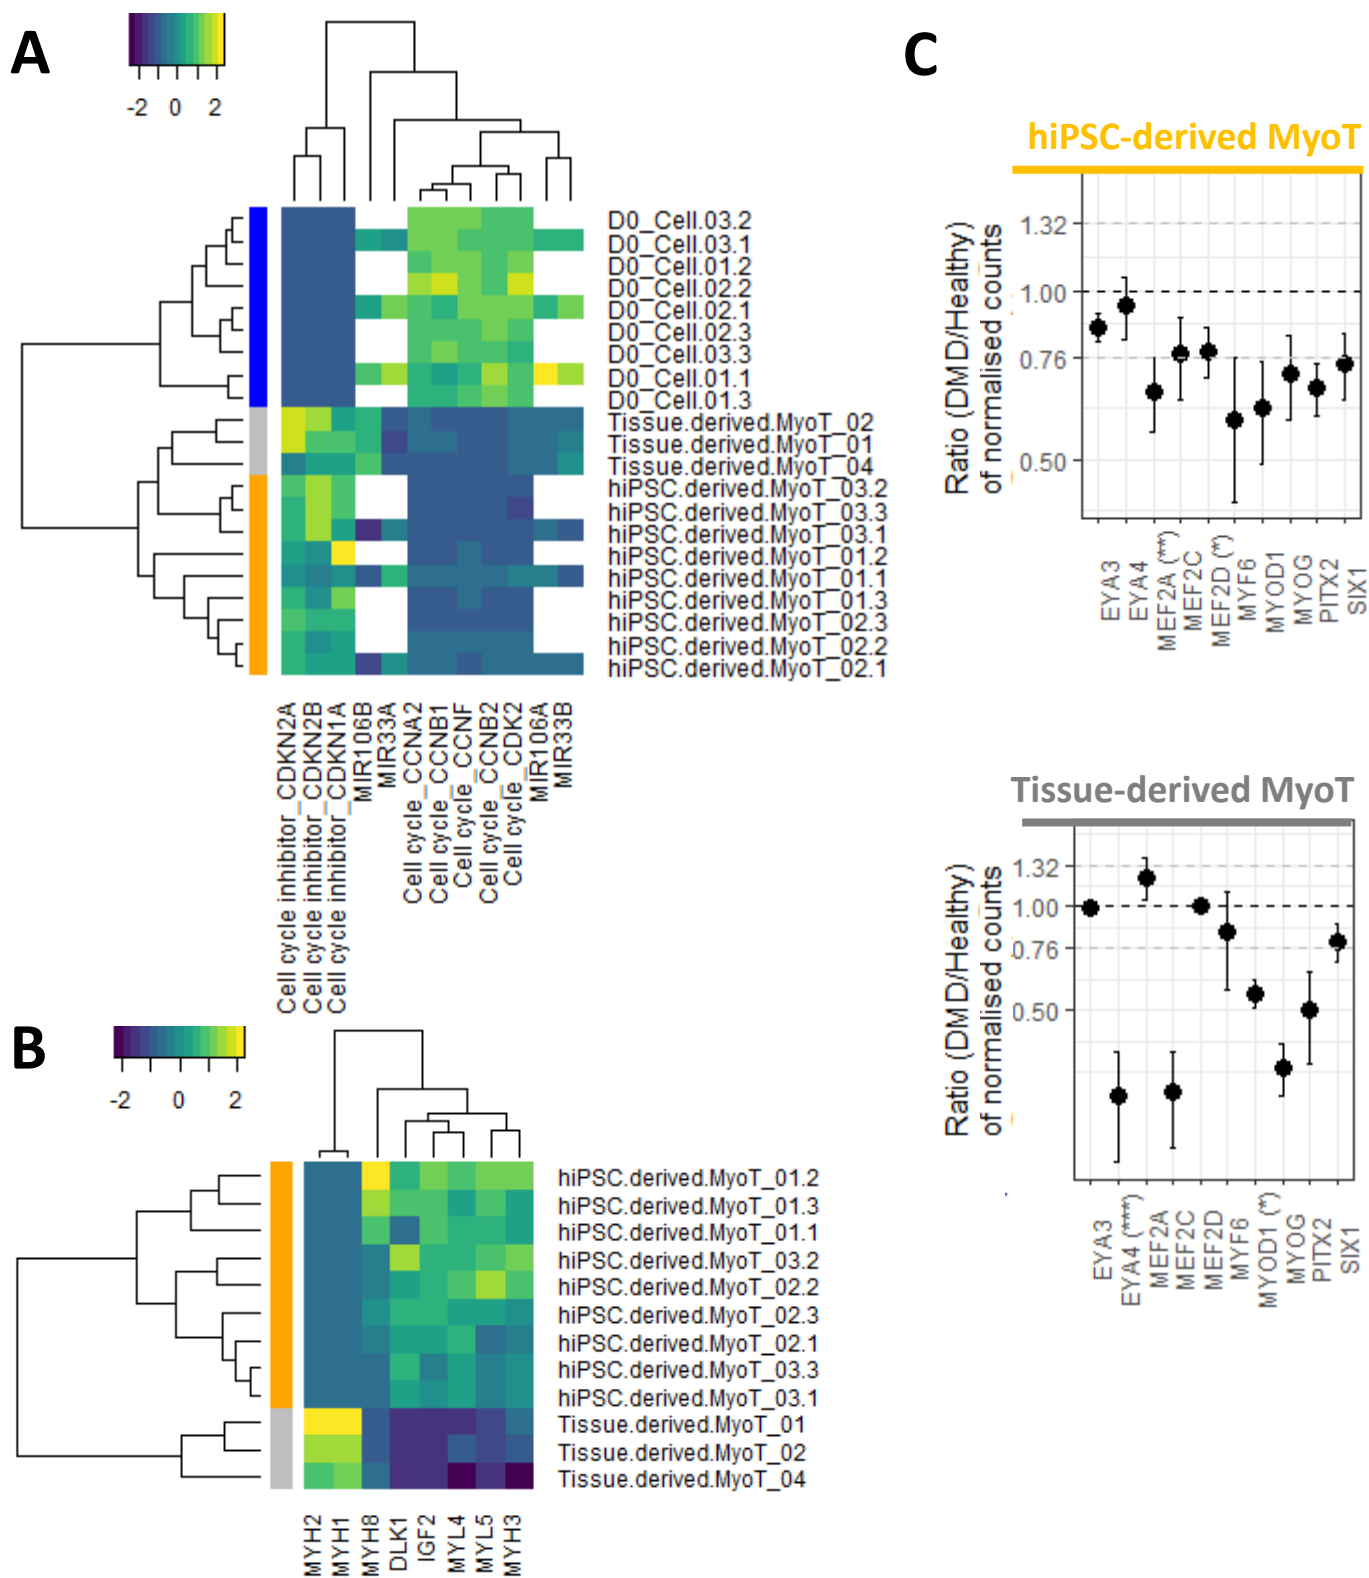

**Figure S12 – Comparison of hiPSC-derived and tissue-derived MyoT for the expression of cell cycle genes and myogenic regulators.** Hierarchical clustering and heatmap of **A**) selected cell cycle transcripts and miRNAs, and **B**) DLK1, IGF2 and selected myosin transcripts in hiPSCs (D0), hiPSC- and tissue-derived MyoT. **C**) Dotplot of DMD/healthy expression ratio of muscle transcription factors. Significant statistical differences are shown in brackets (\*adjusted p-value  $\leq 0.05$ , \*\*adjusted p-value  $\leq 0.01$ , \*\*\*adjusted p-value  $\leq 0.001$ , \*\*\*\*adjusted p-value  $\leq 0.0001$ ). (hiPSC: human induced pluripotent stem cell; MyoT: myotube).
